# Supplementary material
Source: publisher figshare collection journal article supplement (https://acs.figshare.com/ndownloader/files/4496152)
Supplement: Supplementary file 1 [file 4496152]

## Supporting Information

The Crystalline Self-Assembly of A Bowl-liked Cyclotriguaiacylene  
Derivative with Alcohol/Phenols by Hydrogen Bonding and C–H $\cdots\pi$   
interactions: The Self-Inclusion Extended Organic Frameworks

*Yan-Yan Shi,<sup>†</sup> Junliang Sun,<sup>‡</sup> Zhi-Tang Huang,<sup>†</sup> and Qi-Yu Zheng<sup>†,\*</sup>*

Beijing National Laboratory for Molecular Sciences, CAS Key Laboratory of Molecular  
Recognition and Function, Institute of Chemistry, Chinese Academy of Sciences, Beijing  
100190, China, and Structural Chemistry and Berzelii Centre EXSELENT on Porous  
Materials, Stockholm University, S-106 91 Stockholm, Sweden.

zhengqy@iccas.ac.cn

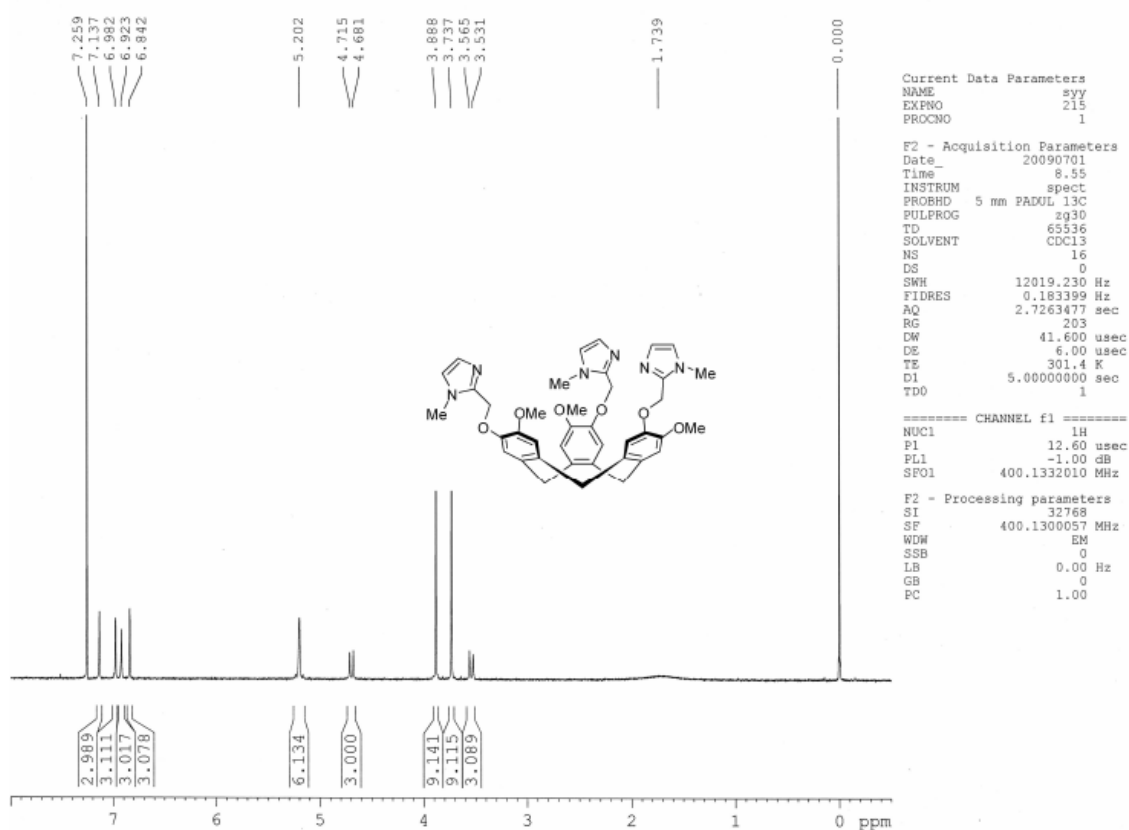

Figure S1. <sup>1</sup>H-NMR spectrum of compound 1

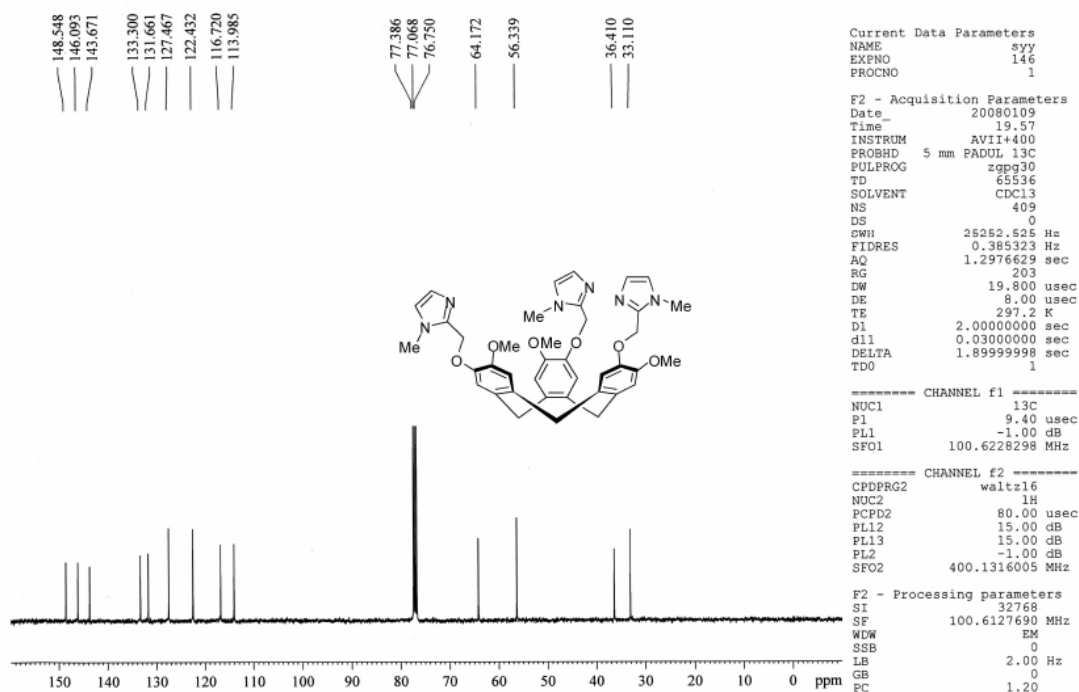

Figure S2. <sup>13</sup>C-NMR spectrum of compound 1

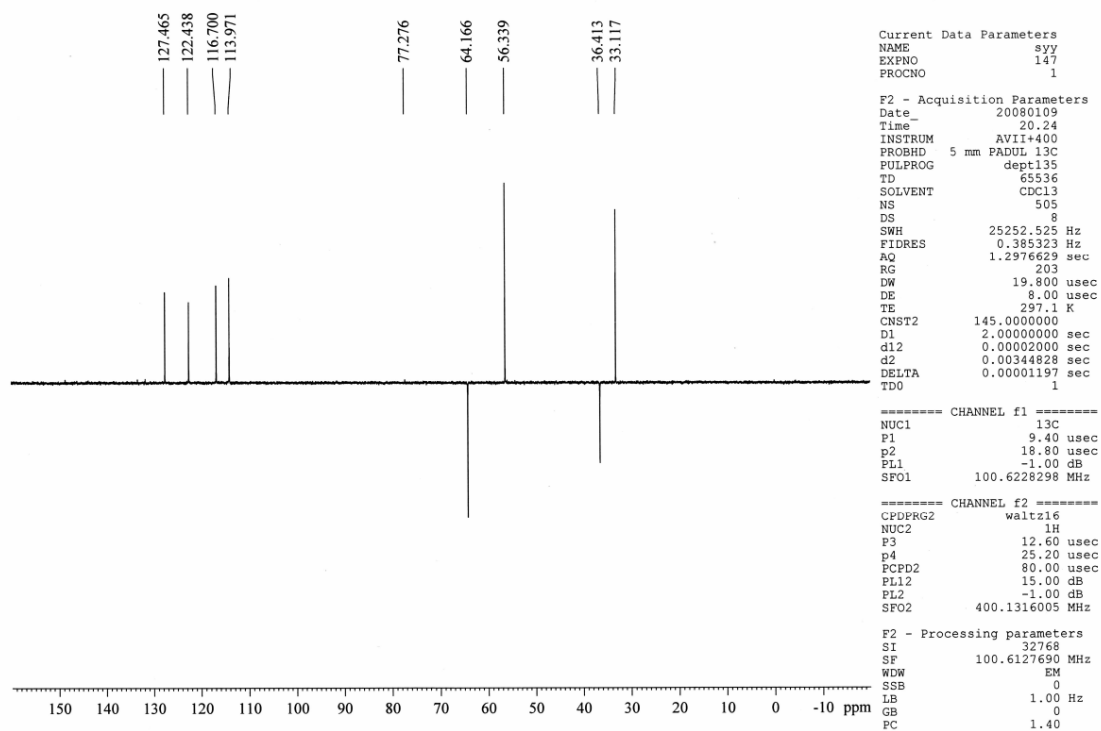

Figure S3. dept-135 spectrum of compound 1

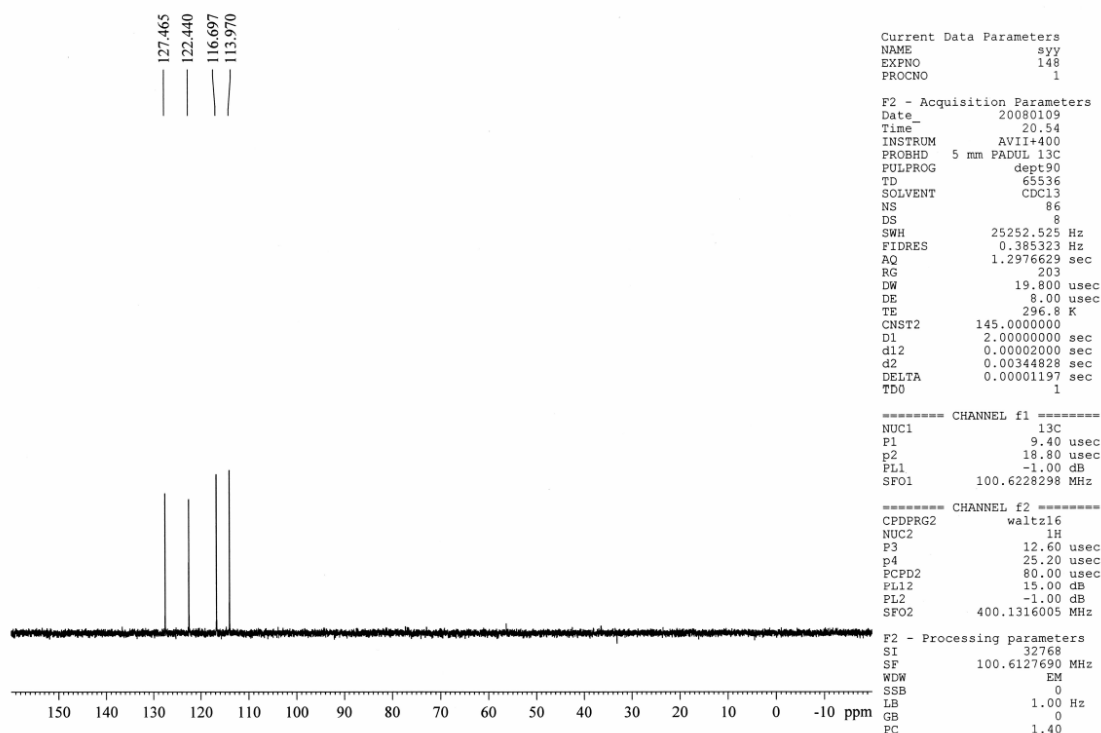

Figure S4. dept-90 spectrum of compound 1

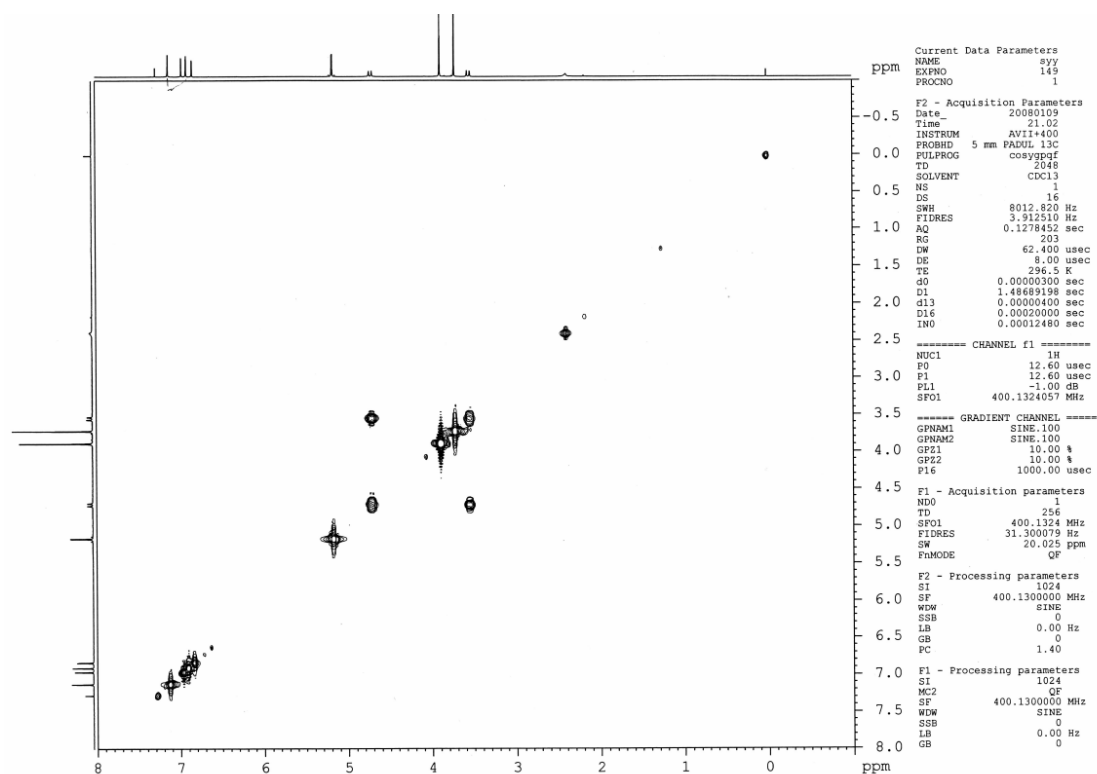

Figure S5. H-H-cosy spectrum of compound **1**

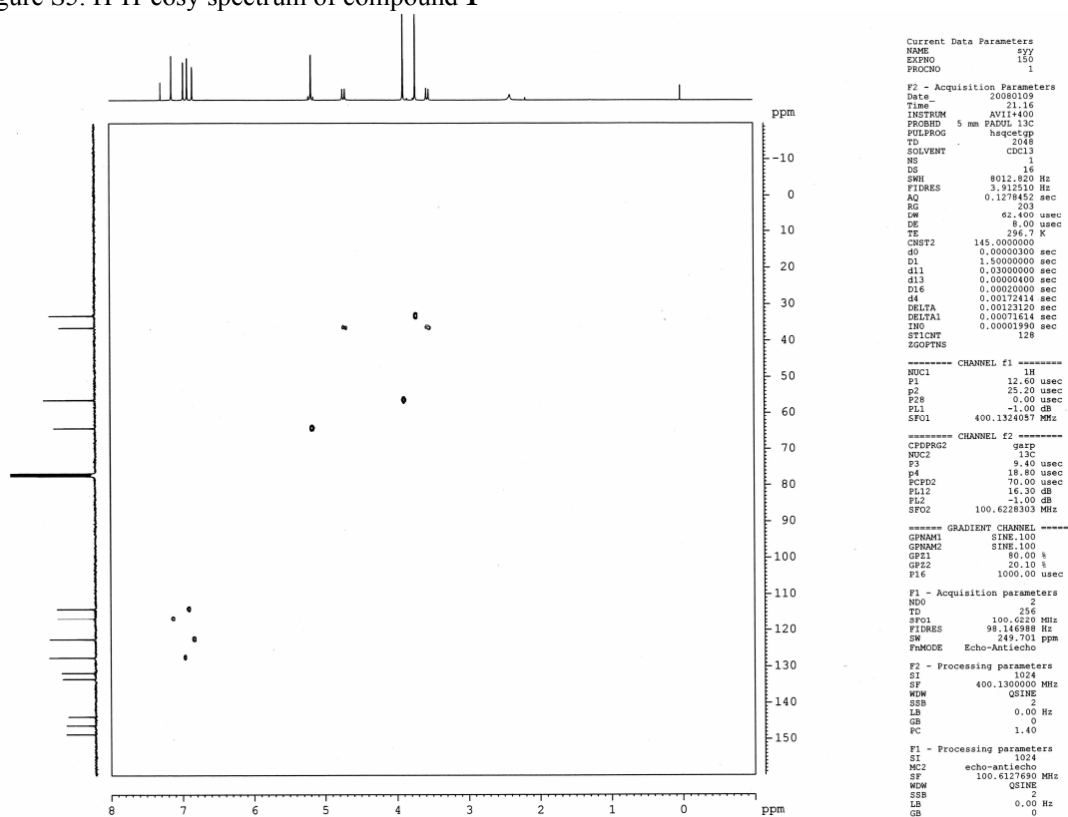

Figure S6. C-H-HSQC spectrum of compound **1**

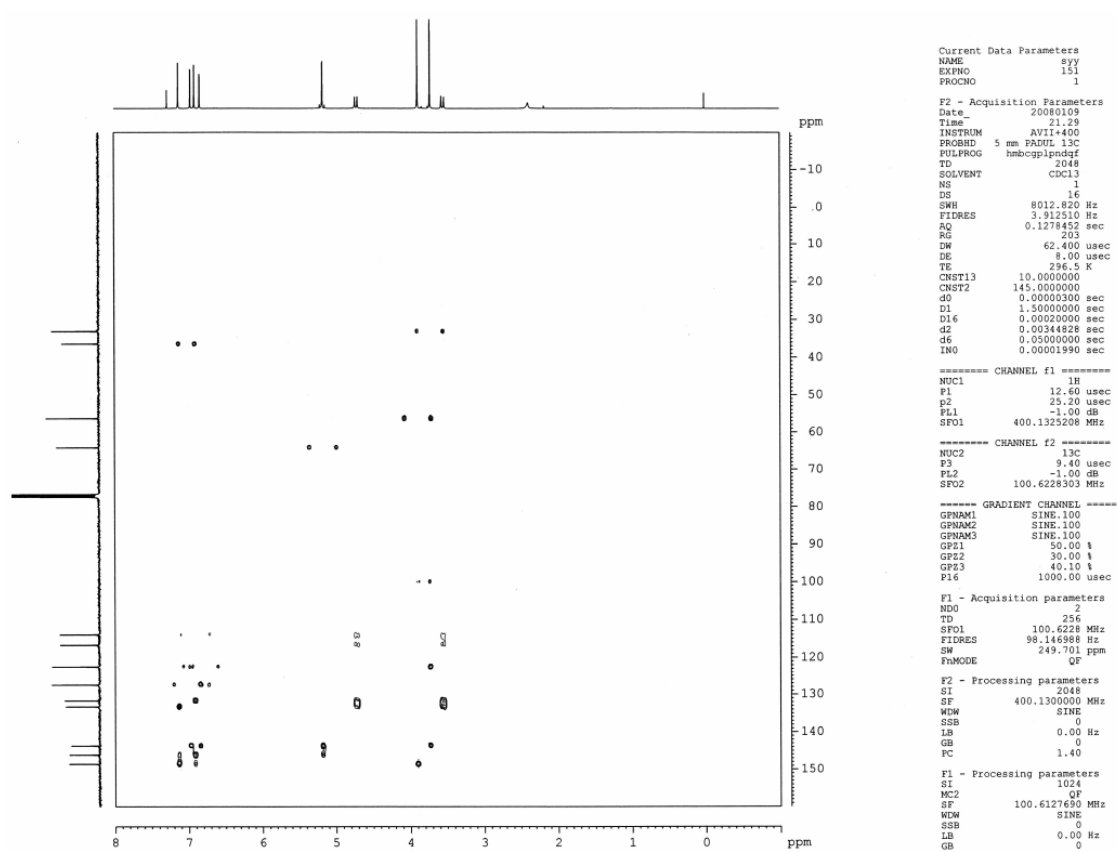

Figure S7. C-H-HMBC spectrum of compound **1**
